# Supplementary material for: Pharmacogenomic Approach to Identify Drug Sensitivity in Small-Cell Lung Cancer
Source: PubMed Central journal article supplement (PMC4157793; doi:10.1371/journal.pone.0106784), 2014-09-08

**Figure S1. CCLE Boxplot and data for IC50s:** There are 53 cell lines for small cell lung cancer. The boxplots show drugs listed on the x-axis and the corresponding IC<sub>50</sub> values (in μM) listed on the y-axis. The ‘ceiling’ for drug efficacy was set at 8 μM; if the IC<sub>50</sub> of all tested cells was above this concentration a single line would appear at the top of the graph. This represents an ineffective drug. By contrast, if all tested cells were sensitive to a given drug, a narrow box and whisker plot would appear at the bottom of the graph. The line within individual boxes represents the median IC<sub>50</sub> value of all tested cells and the circles represent ‘outlier’ cells whose IC<sub>50</sub> values do not fall within the 25-75% quantile of all IC<sub>50</sub> values measured for that drug (represented by the box).

**Boxplot of IC50 for 24 drugs&all cell lines with Barretina paper**

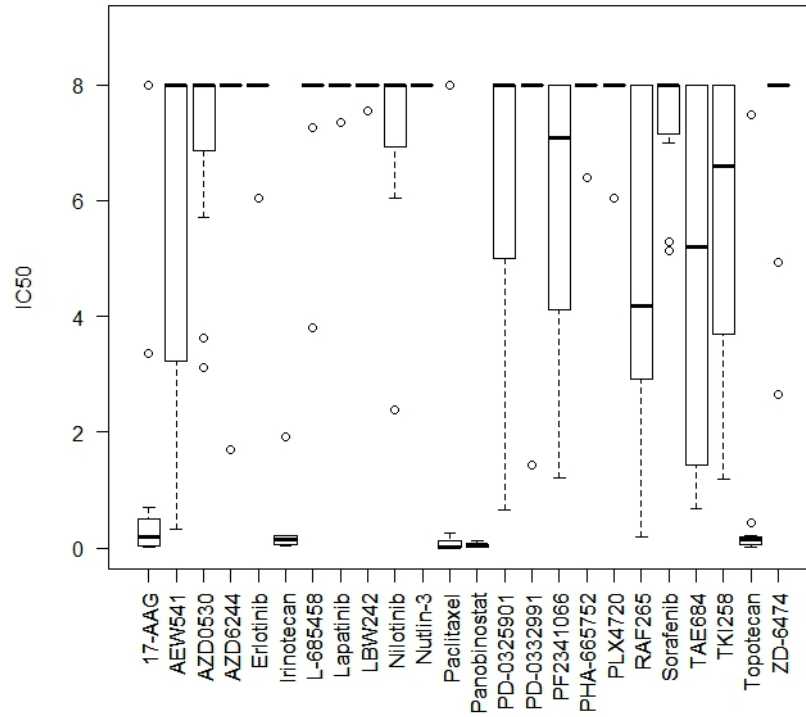

Supplement: pone.0106784.s001.pdf [file pone.0106784.s001.pdf]
